# Supplementary material for: IFNγ Inhibits the Cytosolic Replication of Shigella flexneri via the Cytoplasmic RNA Sensor RIG-I
Source: PLoS Pathog. 2012 Aug 9;8(8):e1002809. doi: 10.1371/journal.ppat.1002809 (PMC3415441; doi:10.1371/journal.ppat.1002809)
Supplement: Table S1 — List of genes regulated by IFNγ during S. flexneri infection. (XLS) [file ppat.1002809.s003.xls]

## Sheet: Sheet1
Probe Set ID	Fold induction by IFNg	Gene Symbol	NCBI Gene ID
1449009_at	667.575	Tgtp /// Tgtp2	100039796 /// 21822
1419043_a_at	612.052	Iigp1	60440
1418652_at	528.341	Cxcl9	17329
1438676_at	480.401	Mpa2l	100702
1419042_at	443.678	Iigp1	60440
1447927_at	330.262	Mpa2l	100702
1417141_at	170.946	Igtp	16145
1418392_a_at	143.455	Gbp3	55932
1456907_at	132.905	Cxcl9	17329
1417292_at	110.11	Ifi47	15953
1417793_at	104.274	Irgm2	54396
1434380_at	96.1114	Gbp6	229900
1425156_at	93.6651	Gbp6	229900
1418240_at	87.1079	Gbp2	14469
1435906_x_at	84.8629	Gbp2	14469
1421009_at	77.7773	Rsad2	58185
1419697_at	70.0162	Cxcl11	56066
1453196_a_at	67.6663	Oasl2	23962
1450484_a_at	66.9013	Cmpk2	22169
1419714_at	65.807	Cd274	60533
1451564_at	61.0648	Parp14	547253
1422962_a_at	60.3198	Psmb8	16913
1437176_at	55.049	AI451557	102084
1421008_at	51.7821	Rsad2	58185
1443698_at	49.9561	Xaf1	327959
1418580_at	48.5688	Rtp4	67775
1450696_at	47.9994	Psmb9	16912
1426906_at	46.8288	Ifi203	15950
1451567_a_at	46.7894	Ifi203	15950
1418536_at	46.4145	H2-Q7	15018
1434046_at	43.9123	AA467197	433470
1436058_at	43.0453	Rsad2	58185
1448775_at	39.6536	Ifi203	15950
1416714_at	37.5786	Irf8	15900
1423555_a_at	35.6048	Ifi44	99899
1416016_at	34.9549	Tap1	21354
1452178_at	33.9209	LOC671535 /// Plec1	18810 /// 671535
1452231_x_at	32.9694	Ifi203	15950
1431008_at	31.622	0610037M15Rik	68395
1418191_at	31.1138	LOC100048346 /// Usp18	100048346 /// 24110
1419762_at	30.9512	Ubd	24108
1449025_at	30.4277	Ifit3	15959
1418776_at	30.1152	5830443L24Rik	76074
1422095_a_at	29.2098	Cmpk2	22169
1424923_at	29.1637	Serpina3g	20715
1435208_at	28.2541	Dtx3l	209200
1448940_at	27.2923	Trim21	20821
1416897_at	26.928	Parp9	80285
1439825_at	26.7614	Dtx3l	209200
1452348_s_at	26.5463	100040462 /// Ifi203 /// Ifi204 /// Ifi205 /// LOC192690 /// LOC640890 /// Mnda	100040462 /// 15950 /// 15951 /// 192690 /// 226695 /// 381308 /// 640890
1416625_at	26.1523	Serping1	12258
1418930_at	25.8036	Cxcl10	15945
1450033_a_at	25.5026	Stat1	20846
1425394_at	24.9081	BC023105	667597
1450783_at	24.5597	Ifit1	15957
1418825_at	24.009	Irgm1	15944
1430005_a_at	23.9447	Batf2	74481
1429947_a_at	23.5388	Zbp1	58203
1438037_at	22.3783	Herc5	67138
1429184_at	22.0662	Gvin1	74558
1436576_at	21.8607	Fam26f	215900
1429195_at	21.8444	Apol6	71939
1449556_at	21.5539	C920025E04Rik /// H2-T23	15040 /// 667803
1452349_x_at	21.4496	Ifi205 /// Mnda	226695 /// 381308
1432026_a_at	21.4297	Herc5	67138
1418126_at	21.1328	Ccl5	20304
1427076_at	20.3195	Mpeg1	17476
1451644_a_at	19.8409	0610037M15Rik /// H2-gs10	436493 /// 68395
1419603_at	19.4112	Ifi204	15951
1450034_at	19.2017	Stat1	20846
1431591_s_at	18.789	677168 /// Isg15	100038882 /// 677168
1420915_at	18.7745	Stat1	20846
1424921_at	18.6358	Bst2	69550
1453757_at	18.5455	Herc5	67138
1418990_at	18.1854	Ms4a4d	66607
1438868_at	17.689	D14Ertd668e	219132
1453913_a_at	17.4461	Tap2	21355
1456873_at	17.3072	Clic5	224796
1451860_a_at	17.2404	Trim30	20128
1448436_a_at	17.1365	Irf1	16362
1424067_at	15.2965	Icam1	15894
1417172_at	15.2319	Ube2l6	56791
1424354_at	15.2047	Tmem140	68487
1421911_at	15.165	Stat2	20847
1425719_a_at	15.0848	Nmi	64685
1458381_at	14.1803	Clic5	224796
1435665_at	14.1504	AI451617	209387
1427746_x_at	14.0278	H2-K1	14972
1426774_at	13.9547	Parp12	243771
1450424_a_at	13.8302	Il18bp	16068
1451905_a_at	13.4427	Mx1	17857
1419604_at	13.4102	Zbp1	58203
1424041_s_at	13.2966	C1s /// LOC100044326	100044326 /// 50908
1439068_at	13.1269	Erap1	80898
1451777_at	12.7879	Ddx60	234311
1450403_at	12.4387	Stat2	20847
1460603_at	12.3264	Samd9l	209086
1424948_x_at	12.2845	H2-D1 /// H2-K1 /// LOC100044874	100044874 /// 14964 /// 14972
1427381_at	12.1047	Irg1	16365
1426276_at	12.0761	Ifih1	71586
1425336_x_at	11.8741	H2-K1	14972
1426971_at	11.6105	Ube1l	74153
1450165_at	11.4258	Slfn2	20556
1415978_at	11.3845	Tubb3	22152
1417961_a_at	11.3022	Trim30	20128
1424857_a_at	11.1668	Trim34	94094
1448632_at	11.0642	Psmb10	19171
1439505_at	10.9778	Clic5	224796
1424518_at	10.5435	Apol9a /// Apol9b	223672 /// 71898
1416942_at	10.4374	Erap1	80898
1443858_at	10.3311	9230105E10Rik	319236
1435290_x_at	10.3291	H2-Aa	14960
1437432_a_at	10.2178	Trim12	76681
1450378_at	10.1403	Tapbp	21356
1424339_at	10.0644	Oasl1	231655
1418077_at	10.0175	Trim21	20821
1419684_at	9.89031	Ccl8	20307
1430802_at	9.7084	H2-Q8	15019
1424775_at	9.39721	Oas1a	246730
1456494_a_at	9.39704	AI451617 /// Trim30	20128 /// 209387
1421812_at	9.29973	Tapbp	21356
1445271_at	9.2941	9230105E10Rik	319236
1418293_at	9.02226	Ifit2	15958
1436172_at	8.63709	9530028C05	330256
1449591_at	8.4728	Casp4	12363
1426324_at	8.25527	H2-D1	14964
1448380_at	8.12204	Lgals3bp	19039
1422782_s_at	8.07374	Tlr3	142980
1445897_s_at	7.8878	Ifi35	70110
1417244_a_at	7.88513	Irf7	54123
1449297_at	7.71419	Casp12	12364
1451655_at	7.67659	Slfn8	276950
1424617_at	7.49354	Ifi35	70110
1424383_at	7.4609	Tmem51	214359
1429570_at	7.41001	Mlkl	74568
1418219_at	7.32636	Il15	16168
1417189_at	7.31062	Psme2	19188
1451683_x_at	7.28939	H2-D1	14964
1418981_at	7.27986	Casp12	12364
1418131_at	7.11934	Samhd1	56045
1449143_at	7.0607	Rtp4	67775
1448562_at	7.03387	Upp1	22271
1452087_at	6.78538	Epsti1	108670
1451544_at	6.75703	Tapbpl	213233
1426970_a_at	6.74986	D330022A01Rik /// Ube1l	320169 /// 74153
1421358_at	6.71092	H2-M3	14991
1418322_at	6.56901	Crem	12916
1440481_at	6.56415	Stat1	20846
1455500_at	6.56261	Rnf213	672511
1419477_at	6.55057	Clec2d	93694
1450446_a_at	6.41095	Socs1	12703
1451931_x_at	6.3981	H2-L	14980
1435454_a_at	6.323	BC006779	229003
1425545_x_at	6.3087	H2-D1	14964
1455899_x_at	6.30774	Socs3	12702
1422781_at	6.2863	Tlr3	142980
1451784_x_at	6.17222	H2-D1	14964
1417056_at	6.17118	Psme1	19186
1421571_a_at	6.0358	LOC100045833 /// Ly6c1 /// Ly6c2	100041546 /// 100045833 /// 17067
1421550_a_at	6.02985	Trim34	94094
1448452_at	6.02492	Irf8	15900
1425519_a_at	5.97569	Cd74	16149
1449037_at	5.9602	Crem	12916
1431095_a_at	5.91566	Herc5	67138
1444064_at	5.87148	Samhd1	56045
1421998_at	5.85719	Tor3a	30935
1439341_at	5.85012	AK220484	381157
1457664_x_at	5.81141	C2	12263
1449875_s_at	5.69111	H2-T10 /// H2-T17 /// H2-T22 /// H2-T9	15024 /// 15032 /// 15039 /// 15051
1448681_at	5.65529	Il15ra	16169
1456890_at	5.63018	Ddx58	230073
1435331_at	5.6191	LOC100048304 /// Pyhin1	100048304 /// 236312
1459151_x_at	5.60775	Ifi35	70110
1428660_s_at	5.55048	LOC100047963 /// Tor3a	100047963 /// 30935
1456212_x_at	5.49567	Socs3	12702
1451721_a_at	5.48612	H2-Ab1	14961
1422648_at	5.45355	Slc7a2	11988
1450297_at	5.35274	Il6	16193
1421322_a_at	5.35259	Irf9	16391
1449227_at	5.09084	Ch25h	12642
1431261_at	5.06837	Clic5	224796
1422305_at	5.01686	Ifnb1	15977
1436472_at	5.00767	Slfn9	237886
1420437_at	4.98242	Ido1	15930
1434438_at	4.92707	Samhd1	56045
1426008_a_at	4.89965	Slc7a2	11988
1419282_at	4.87866	Ccl12	20293
1449195_s_at	4.86273	Cxcl16	66102
1444619_x_at	4.80391	Psmb8	16913
1433935_at	4.75393	AU020206	101757
1428767_at	4.71242	Gsdmd	69146
1422397_a_at	4.63516	Il15ra	16169
1426221_at	4.61128	Vwa5a	67776
1419132_at	4.60127	Tlr2	24088
1444003_at	4.60001	Neurl3	214854
1422601_at	4.55592	Serpinb9	20723
1417009_at	4.55384	C1r	50909
1437787_at	4.53951	Lrrtm2	107065
1453939_x_at	4.52434	677168	677168
1431055_a_at	4.52103	Snx10	71982
1454733_at	4.47396	Nod1	107607
1436941_at	4.46919	Fam55c	385658
1450173_at	4.46091	Ripk2	192656
1439221_s_at	4.45581	Cd40	21939
1454974_at	4.4356	Ntn1	18208
1434580_at	4.34819	Enpp4	224794
1425294_at	4.30072	Slamf8	74748
1416576_at	4.2909	Socs3	12702
1422006_at	4.28119	Eif2ak2	19106
1436555_at	4.24858	Slc7a2	11988
1416051_at	4.21096	C2	12263
1425728_at	4.2094	Psme2b-ps	621823
1439790_at	4.20611	Serpinb9	20723
1454169_a_at	4.16949	Epsti1	108670
1419676_at	4.10464	Mx2	17858
1456288_at	4.065	Slfn5	327978
1440866_at	4.05936	Eif2ak2	19106
1417071_s_at	4.03958	Cyp4v3	102294
1450672_a_at	4.02776	Trex1	22040
1455489_at	4.01283	Lrrtm2	107065
1451821_a_at	3.99126	Sp100	20684
1416200_at	3.97692	Il33	77125
1448607_at	3.97596	Nampt	59027
1460415_a_at	3.97146	Cd40	21939
1422005_at	3.94717	Eif2ak2	19106
1420964_at	3.89558	Enc1	13803
1438716_at	3.88952	AI451617	209387
1434139_at	3.85048	Parp11	101187
1435343_at	3.82236	Dock10	210293
1436562_at	3.7982	Ddx58	230073
1450454_at	3.79567	Tor3a	30935
1450534_x_at	3.76876	H2-K1	14972
1427091_at	3.7655	Znfx1	98999
1420342_at	3.75544	Gdap10	14546
1449984_at	3.7406	Cxcl2	20310
1419879_s_at	3.73469	Trim25	217069
1448659_at	3.72135	Casp7	12369
1417190_at	3.6867	Nampt	59027
1421365_at	3.67526	Fst	14313
1451321_a_at	3.67376	Rbm43	71684
1439276_at	3.6626	Adar	56417
1417070_at	3.63156	Cyp4v3	102294
1449473_s_at	3.62537	Cd40	21939
1418718_at	3.62415	Cxcl16	66102
1424496_at	3.58893	5133401N09Rik	75731
1460038_at	3.57724	LOC100045707 /// Pou3f1	100045707 /// 18991
1425974_a_at	3.52623	Trim25	217069
1431079_at	3.50685	C1qtnf2	69183
1428346_at	3.4738	Trafd1	231712
1452639_at	3.46859	Enpp4	224794
1425405_a_at	3.46844	Adar	56417
1436365_at	3.46836	Zbtb7c	207259
1432548_at	3.45398	Parp14	547253
1426062_a_at	3.42151	Casp7	12369
1418346_at	3.38104	Insl6	27356
1426415_a_at	3.3781	Trim25	217069
1439773_at	3.37793	Ly6e	17069
1457035_at	3.36395	AI607873	226691
1460187_at	3.35445	Sfrp1	20377
1455869_at	3.33549
1448177_at	3.31661	Tap1	21354
1423006_at	3.31355	Pim1	18712
1434372_at	3.28058	AW112010	107350
1420768_a_at	3.27801	Dhx58	80861
1418847_at	3.26999	Arg2	11847
1449449_at	3.26582	Ptges	64292
1459913_at	3.26363	Tnfsf10	22035
1436183_at	3.25873	Zc3hav1	78781
1417785_at	3.24958	Pla1a	85031
1458595_at	3.2398	Intu	380614
1452289_a_at	3.23695	Rnf135	71956
1419427_at	3.23548	Csf3	12985
1426092_a_at	3.21049	Trim34	94094
1427736_a_at	3.20229	Ccrl2	54199
1454809_at	3.18421	Ncoa7	211329
1421228_at	3.18023	Ccl7	20306
1439747_at	3.14604	Ptges	64292
1416380_at	3.13607	Mov10	17454
1428378_at	3.12476	Zc3hav1	78781
1428332_at	3.1244	Pik3ip1	216505
1417470_at	3.1234	Apobec3	80287
1421236_at	3.11478	Ripk2	192656
1450170_x_at	3.11222	H2-D1	14964
1419709_at	3.1107	Stfa3	20863
1451611_at	3.09139	Pla2g16	225845
1450949_at	3.0908	Katna1	23924
1460197_a_at	3.0863	Steap4	117167
1449580_s_at	3.0772	H2-DMb1 /// H2-DMb2	14999 /// 15000
1445597_s_at	3.06357	Pla2g16	225845
1455581_x_at	3.03872	9530028C05	330256
1449425_at	3.02865	Wnt2	22413
1451006_at	3.02803	Xdh	22436
1435695_a_at	3.02632	Ggct	110175
1419026_at	3.02058	Daxx	13163
1418045_at	3.01593	Inpp1	16329
1435596_at	3.01485	Pion	212167
1435458_at	2.9961	Pim1	18712
1416885_at	2.98386	1110038F14Rik	117171
1450648_s_at	2.97867	H2-Ab1	14961
1432478_a_at	2.97389	Rnf19b	75234
1451426_at	2.95675	Dhx58	80861
1460251_at	2.9265	Fas	14102
1455085_at	2.92191	1700086L19Rik	74284
1435529_at	2.90609	OTTMUSG00000016644	667373
1444350_at	2.90409	Slfn10	237887
1438841_s_at	2.89958	Arg2	11847
1430352_at	2.88437	Adamts9	101401
1425119_at	2.87056	Oas1b	23961
1415803_at	2.8628	Cx3cl1	20312
1439121_at	2.84169	H2-T10 /// H2-T17 /// H2-T22 /// H2-T9	15024 /// 15032 /// 15039 /// 15051
1453299_a_at	2.83741	LOC100045567 /// Pnp1 /// Pnp2	100045567 /// 18950 /// 667034
1426133_a_at	2.83741	Mitd1	69028
1418634_at	2.83274	Notch1	18128
1419698_at	2.79861	Cxcl11	56066
1437868_at	2.7916	Fam46a	212943
1423635_at	2.78976	Bmp2	12156
1451775_s_at	2.781	Il13ra1	16164
1422629_s_at	2.77383	Shroom3	27428
1447621_s_at	2.76212	Tmem173	72512
1428136_at	2.7616	Sfrp1	20377
1439972_at	2.75557	Etnk1	75320
1438858_x_at	2.75537	H2-Aa	14960
1437128_a_at	2.75373	A630033E08Rik	240041
1426210_x_at	2.74391	Parp3	235587
1425106_a_at	2.74237	Wars	22375
1419401_at	2.72623	Asb13	142688
1420965_a_at	2.72526	Enc1	13803
1450829_at	2.71702	Tnfaip3	21929
1420272_at	2.71244	Samhd1	56045
1438148_at	2.71069	Cxcl3	330122
1449450_at	2.69943	Ptges	64292
1419534_at	2.69662	Olr1	108078
1421291_at	2.69136	Il18rap	16174
1451340_at	2.6881	Arid5a	214855
1435130_at	2.68278	Fam18a	383103
1450160_at	2.67484	Lif	16878
1434333_a_at	2.66475	Prkd2	101540
1427164_at	2.66385	Il13ra1	16164
1434458_at	2.65446	Fst	14313
1434457_at	2.6541	Sp100	20684
1422959_s_at	2.65387	Rnf114	81018
1426222_s_at	2.6532	Vwa5a	67776
1435226_at	2.63025	Rnf19b	75234
1419272_at	2.62659	Myd88	17874
1455070_at	2.62474	Dcp2	70640
1433699_at	2.62232	Tnfaip3	21929
1427747_a_at	2.60027	Lcn2	16819
1415694_at	2.59318	Wars	22375
1454791_a_at	2.59133	Rbbp4	19646
1417185_at	2.58928	Ly6a	110454
1419569_a_at	2.58357	Isg20	57444
1425722_at	2.58336	LOC435565	435565
1433919_at	2.58015	Asb4	65255
1420697_at	2.57544	Slc15a3	65221
1435330_at	2.5706	BC094916 /// LOC100048304 /// LOC637605 /// Pyhin1	100048304 /// 236312 /// 545384 /// 637605
1440108_at	2.56171	Foxp2	114142
1437832_x_at	2.55992	LOC100046672 /// Wars	100046672 /// 22375
1456437_x_at	2.54717	667277 /// C1r	50909 /// 667277
1448377_at	2.54409	Slpi	20568
1430150_at	2.54106	Dcp2	70640
1427874_at	2.53172	Rnf114	81018
1416530_a_at	2.51348	LOC100045567 /// Pnp1	100045567 /// 18950
1449289_a_at	2.51006	B2m	12010
1426223_at	2.48671	Ttc39c	72747
1450061_at	2.47962	Enc1	13803
1437484_at	2.47876	Zbtb5	230119
1451969_s_at	2.4739	Parp3	235587
1428196_a_at	2.4697	Fam82a2	67809
1457342_at	2.4677	Ikzf4	22781
1434813_x_at	2.43748	Wars	22375
1454757_s_at	2.43472	Ifi27l1	52668
1439680_at	2.43239	Tnfsf10	22035
1423753_at	2.43208	Bambi	68010
1433515_s_at	2.42925	Etnk1	75320
1435193_at	2.42551	A230050P20Rik	319278
1418678_at	2.42275	Has2	15117
1415989_at	2.4208	Vcam1	22329
1421207_at	2.42074	Lif	16878
1427911_at	2.4139	Tmem173	72512
1450140_a_at	2.41074	Cdkn2a	12578
1423062_at	2.40949	Igfbp3	16009
1452431_s_at	2.40421	H2-Aa	14960
1427429_at	2.40024	Csf2	12981
1419832_s_at	2.39504	Acpp	56318
1454350_at	2.39471	Intu	380614
1452013_at	2.39355	Atp10a	11982
1416273_at	2.3876	Tnfaip2	21928
1429422_at	2.38525	4933412E12Rik	71086
1416871_at	2.37595	Adam8	11501
1437250_at	2.36843	Mreg	381269
1425025_at	2.36346	Tmem106a	217203
1453392_at	2.35763	Ttc39b	69863
1456545_at	2.35571	Il18rap	16174
1420273_x_at	2.3516	Samhd1	56045
1455607_at	2.35049	Rspo3	72780
1453304_s_at	2.34881	Ly6e	17069
1422403_at	2.33194	Ifna1 /// Ifna12 /// Ifna13 /// Ifna14 /// Ifna2 /// Ifna4 /// Ifna5 /// Ifna6 /// Ifna7 /// Ifna9 /// Ifnab /// OTTMUSG00000007655 /// OTTMUSG00000011275	15962 /// 15965 /// 15967 /// 15968 /// 15969 /// 15970 /// 15972 /// 15974 /// 230396 /// 230398 /// 242517 /// 242519 /// 404549
1452777_a_at	2.33023	Nub1	53312
1435697_a_at	2.3237	Cytip	227929
1448395_at	2.31827	Sfrp1	20377
1441380_at	2.31588	Ttc39c	72747
1422512_a_at	2.31483	Ogfr	72075
1451452_a_at	2.30988	Rgs16	19734
1419721_at	2.3095	Niacr1	80885
1453070_at	2.30729	Pcdh17	219228
1417600_at	2.30333	Slc15a2	57738
1419204_at	2.30196	Dll1	13388
1452428_a_at	2.29978	B2m	12010
1455991_at	2.2976	Ccbl2	229905
1447711_x_at	2.29736	4933412E12Rik	71086
1417977_at	2.29614	Eif4e3	66892
1450703_at	2.28925	Slc7a2	11988
1421473_at	2.28614	Il1a	16175
1427165_at	2.28377	Il13ra1	16164
1434037_s_at	2.28279	Kat2b	18519
1454783_at	2.27791	Il13ra1	16164
1438613_at	2.27488	Kcna4	16492
1434350_at	2.27114	Csrnp1	215418
1423754_at	2.26803	Ifitm3	66141
1423170_at	2.26091	Taf7	24074
1423222_at	2.26003	Cap2	67252
1420993_at	2.25826	B3gnt5	108105
1430111_a_at	2.2565	Bcat1	12035
1422511_a_at	2.25578	Ogfr	72075
1455051_at	2.25105	Rnf31	268749
1419537_at	2.24924	Tcfec	21426
1426942_at	2.24308	Aim1	11630
1449169_at	2.24116	Has2	15117
1422029_at	2.24078	Ccl20	20297
1455975_x_at	2.2351	Rnf114	81018
1424250_a_at	2.23399	Arhgef3	71704
1435748_at	2.224	Gda	14544
1422556_at	2.22215	Gna13	14674
1429688_at	2.21727	Arntl2	272322
1451320_at	2.20942	Arhgap8	73167
1438700_at	2.20848	Fnbp4	55935
1451206_s_at	2.20725	Cytip	227929
1442018_at	2.20592	Btg1	12226
1434015_at	2.20563	Slc2a6	227659
1417304_at	2.19956	Chrd	12667
1448162_at	2.19668	Vcam1	22329
1433514_at	2.19565	Etnk1	75320
1450910_at	2.1946	Cap2	67252
1430996_at	2.1921	Etnk1	75320
1436589_x_at	2.19195	Prkd2	101540
1428547_at	2.19154	Nt5e	23959
1452519_a_at	2.19072	Zfp36	22695
1450871_a_at	2.18984	Bcat1	12035
1437785_at	2.18978	Adamts9	101401
1422987_at	2.18847	Ntn1	18208
1457697_at	2.18159	A330021E22Rik	207686
1438193_at	2.17773	Nrxn3	18191
1438855_x_at	2.17525	Tnfaip2	21928
1436600_at	2.17362	Tox3	244579
1417978_at	2.16705	Eif4e3	66892
1419099_x_at	2.16601	Stom	13830
1419080_at	2.16448	Gdnf	14573
1456006_at	2.16267	Bcl2l11	12125
1452956_a_at	2.15483	Ifi27l1	52668
1439087_a_at	2.15439	Pik3ip1	216505
1424684_at	2.15064	Rab5c	19345
1436199_at	2.15057	Trim14	74735
1417346_at	2.1495	Pycard	66824
1419530_at	2.14807	Il12b	16160
1450860_at	2.13805	Lap3	66988
1456103_at	2.13713	Pml	18854
1420535_a_at	2.13055	Nub1	53312
1451314_a_at	2.12383	Vcam1	22329
1448610_a_at	2.12069	Sod2	20656
1422126_a_at	2.11531	Nudt13	67725
1418666_at	2.11448	Ptx3	19288
1452127_a_at	2.11325	Ptpn13	19249
1436899_at	2.10916	Zufsp	72580
1425452_s_at	2.10576	Fam84a	105005
1419671_a_at	2.10157	Il17rc	171095
1418133_at	2.08976	Bcl3	12051
1442700_at	2.08685	Pde4b	18578
1428223_at	2.08653	Mfsd2	76574
1427990_at	2.07827	Usp45	77593
1452418_at	2.07441	1200016E24Rik	319202
1451716_at	2.07378	Mafb	16658
1425193_at	2.07192	2010106G01Rik	66552
1419098_at	2.07072	Stom	13830
1417426_at	2.06908	Srgn	19073
1458268_s_at	2.06046	Igfbp3	16009
1443621_at	2.06007	Xaf1	327959
1437451_at	2.05916	Ecscr	68545
1447831_s_at	2.05783	Mtmr7	54384
1427334_s_at	2.05248	2810474O19Rik	67246
1458427_at	2.05076	Brip1	237911
1421057_at	2.05062	Dnase1l3	13421
1453943_a_at	2.04882	Acpp	56318
1426450_at	2.04755	Plcl2	224860
1426604_at	2.04676	Rnasel	24014
1435936_at	2.04583	Slc13a5	237831
1452008_at	2.04084	Ttc39b	69863
1460729_at	2.03968	Rock1	19877
1417193_at	2.03947	Sod2	20656
1446457_at	2.03889	Ddx58	230073
1451854_a_at	2.03385	Shroom3	27428
1431213_a_at	2.03268	LOC433762	433762
1438097_at	2.0314	Rab20	19332
1421600_a_at	2.03067	Trim26	22670
1419004_s_at	2.02813	Bcl2a1a /// Bcl2a1b /// Bcl2a1d	12044 /// 12045 /// 12047
1455342_at	2.027	A230083H22Rik	353211
1436033_at	2.02408	BC031353	235493
1450656_at	2.02303	Gna13	14674
1452973_at	2.01898	Ppm1k	243382
1416701_at	2.0182	Rnd3	74194
1460465_at	2.01818	A930038C07Rik	68169
1420499_at	2.01815	Gch1	14528
1455498_at	2.01698	Gpr50	14765
1439261_x_at	2.01581	Mitd1	69028
1424961_at	2.01491	Tapbpl	213233
1419208_at	2.0141	Map3k8	26410
1416593_at	2.01379	Glrx	93692
1460317_s_at	2.01097	Gna13	14674
1423250_a_at	-2.01394	Tgfb2	21808
1449070_x_at	-2.01493	Apcdd1	494504
1438635_x_at	-2.01615	B930041F14Rik	230991
1433434_at	-2.01752	AW551984	244810
1419358_at	-2.02481	Sorcs2	81840
1422155_at	-2.02713	Hist2h3c2	97114
1418547_at	-2.03402	Tfpi2	21789
1450391_a_at	-2.03406	Mgll	23945
1450923_at	-2.03902	Tgfb2	21808
1452352_at	-2.03973	Ctla2b	13025
1440339_at	-2.04269	Enpp1	18605
1423948_at	-2.0457	Bag2	213539
1416688_at	-2.04653	Snap91	20616
1427485_at	-2.04734	Lmod1	93689
1434758_at	-2.04902	Crispld2	78892
1455521_at	-2.05024	Klf12	16597
1449033_at	-2.05415	Tnfrsf11b	18383
1438532_at	-2.05473	Hmcn1	545370
1417522_at	-2.0664	Fbxo32	67731
1449109_at	-2.06673	Socs2	216233
1448477_at	-2.07141	Chst12	59031
1444236_at	-2.07322	AW552393	99922
1450863_a_at	-2.07646	Dclk1	13175
1436515_at	-2.07648	Bach2	12014
1448590_at	-2.07661	Col6a1	12833
1428260_at	-2.07986	Atl1	73991
1450537_at	-2.08227	Mid2	23947
1415832_at	-2.08384	Agtr2	11609
1417626_at	-2.08494	Pde4dip	83679
1428485_at	-2.08508	Car12	76459
1423286_at	-2.09244	Cbln1	12404
1434479_at	-2.09558	Col5a1	12831
1440884_s_at	-2.09779	A530047J11Rik	103767
1424567_at	-2.09795	Tspan2	70747
1428571_at	-2.09994	Col9a1	12839
1427019_at	-2.1082	Ptprz1	19283
1429022_at	-2.11156	Adcyap1r1	11517
1437347_at	-2.11348	Ednrb	13618
1416474_at	-2.11356	Igdcc4	56741
1421400_at	-2.1213	Kcnmb1	16533
1420512_at	-2.12224	Dkk2	56811
1425894_at	-2.12618	Mrgprf	211577
1453009_at	-2.12802	Cpm	70574
1417917_at	-2.13084	Cnn1	12797
1435456_at	-2.14277	Ttc28	209683
1456060_at	-2.15125	Maf	17132
1452179_at	-2.15507	Phf17	269424
1448747_at	-2.15724	Fbxo32	67731
1416741_at	-2.15751	Col5a1	12831
1449036_at	-2.1597	Rnf128	66889
1436458_at	-2.1697	Sema6a	20358
1423287_at	-2.17125	Cbln1	12404
1416357_a_at	-2.17358	Mcam	84004
1429281_at	-2.17642	2610008E11Rik	72128
1426641_at	-2.18152	Trib2	217410
1439827_at	-2.1868	Adamts12	239337
1457881_at	-2.20353	Osbpl6	99031
1453275_at	-2.23207	2310002L13Rik	75577
1439793_at	-2.23632	Gja3	14611
1450928_at	-2.2368	LOC100045546	100045546
1456335_at	-2.24207	Gm106	226866
1459372_at	-2.24276	Npas4	225872
1438441_at	-2.24415	Id4	15904
1451718_at	-2.24856	Plp1	18823
1454822_x_at	-2.25191	Apcdd1	494504
1455087_at	-2.2539	D7Ertd715e	52480
1435875_at	-2.25703	Prkab2	108097
1424029_at	-2.25891	Tspyl4	72480
1426785_s_at	-2.25936	Mgll	23945
1431049_at	-2.27391	Ica1l	70375
1435874_at	-2.28377	Prkab2	108097
1450734_at	-2.28614	Sec16b	89867
1442001_at	-2.29484	Prkab2	108097
1451939_a_at	-2.30533	Srpx	51795
1429841_at	-2.31143	Megf10	70417
1423831_at	-2.31691	Prkag2	108099
1457429_s_at	-2.32981	Gm106	226866
1437667_a_at	-2.33681	Bach2	12014
1450922_a_at	-2.35322	Tgfb2	21808
1428097_at	-2.35786	2510009E07Rik	72190
1449824_at	-2.36328	Prg4	96875
1448557_at	-2.37591	Fam13c	71721
1417455_at	-2.39993	Tgfb3	21809
1426640_s_at	-2.40382	Trib2	217410
1434657_at	-2.40972	Gls	14660
1451344_at	-2.41883	Tmem119	231633
1459622_at	-2.42659	Gm22	195209
1434140_at	-2.43158	Mcf2l	17207
1418480_at	-2.44721	Ppbp	57349
1452284_at	-2.45883	Ptprz1	19283
1421594_a_at	-2.46732	Sytl2	83671
1433600_at	-2.48049	Adra2a	11551
1423259_at	-2.50427	Id4 /// LOC100045546	100045546 /// 15904
1444061_at	-2.50519	Prr9	109314
1454867_at	-2.52399	Mn1	433938
1418507_s_at	-2.53868	Socs2	216233
1439042_at	-2.55696	Adcyap1r1	11517
1433783_at	-2.57793	Ldb3	24131
1423424_at	-2.59002	Zic3	22773
1445503_at	-2.59262	Gm715	279618
1456878_at	-2.60278	AI646023	192734
1427884_at	-2.62699	Col3a1	12825
1452244_at	-2.62964	6330406I15Rik	70717
1451691_at	-2.66289	Ednra	13617
1419376_at	-2.69232	Fibin	67606
1429679_at	-2.69391	Lrrc17	74511
1434070_at	-2.75098	Jag1	16449
1453214_at	-2.78204	Lrrc15	74488
1436055_at	-2.84193	Lrrc15	74488
1425092_at	-2.89169	Cdh10	320873
1434195_at	-2.9092	Prss35	244954
1436329_at	-2.93786	Egr3	13655
1421106_at	-3.05308	Jag1	16449
1416287_at	-3.27623	Rgs4	19736
1416286_at	-3.69176	Rgs4	19736
1416652_at	-3.71047	Aspn	66695
1436736_x_at	-4.52569	D0H4S114	27528
1448421_s_at	-4.90259	Aspn	66695
1450839_at	-5.09971	D0H4S114	27528
